# Supplementary material
Source: PubMed Central journal article supplement (PMC3514657)
Supplement: NIHMS407248-supplement-Supplemental_table.pdf [file NIHMS407248-supplement-Supplemental_table.pdf]

Supplemental Table S1: List of genes affected in the frontal bones of Wnt1-cre: *Dlx3*<sup>FLacZ</sup> mice as identified by microarray analysis (p value < 0.05; Fold-change >1.5)

| Gene Symbol                             | RefSeq Transcript ID                                                             | p-value(ko vs. wt) | Fold-Change(ko vs. wt) |
|-----------------------------------------|----------------------------------------------------------------------------------|--------------------|------------------------|
| <i>Dlx3</i>                             | NM_010055                                                                        | 2.27E-05           | -16.77                 |
| <i>Lect1</i>                            | NM_010701                                                                        | 0.0006             | -4.19                  |
| <i>Angptl1</i>                          | NM_028333                                                                        | 0.0079             | -3.23                  |
| <i>Calca</i>                            | NM_001033954 /// NM_007587                                                       | 0.0430             | -3.17                  |
| <i>Sost</i>                             | NM_024449                                                                        | 0.0119             | -2.81                  |
| <i>Susd5</i>                            | NM_001101510 /// XM_356198 /// XM_912282                                         | 0.0007             | -2.78                  |
| <i>Lhx9</i>                             | NM_001025565 /// NM_001042577 /// NM_010714                                      | 0.0479             | -2.72                  |
| <i>Prokr1</i>                           | NM_021381                                                                        | 0.0147             | -2.65                  |
| <i>Dlk1</i>                             | NM_010052                                                                        | 0.0132             | -2.64                  |
| <i>Ambn</i>                             | NM_009664                                                                        | 0.0085             | -2.62                  |
| <i>Agtr2</i>                            | NM_007429                                                                        | 0.0158             | -2.51                  |
| <i>Ntng1</i>                            | NM_001163348 /// NM_001163349 /// NM_001163350 /// NM_001163351 /// NM_030699 // | 0.0119             | -2.36                  |
| <i>Col9a1</i>                           | NM_007740                                                                        | 0.0143             | -2.34                  |
| <i>Adam33</i>                           | NM_001163529 /// NM_033615                                                       | 0.0402             | -2.25                  |
| <i>Nov</i>                              | NM_010930                                                                        | 0.0497             | -2.25                  |
| <i>Cntfr</i>                            | NM_001136056 /// NM_001146080 /// NM_016673                                      | 0.0180             | -2.16                  |
| <i>Gpr64</i>                            | NM_001079847 /// NM_001079848 /// NM_001079857 /// NM_178712                     | 0.0267             | -2.13                  |
| <i>Mirg</i>                             | NR_028265 /// XM_001475138                                                       | 0.0392             | -2.09                  |
| <i>H2-K1</i>                            | NM_001001892                                                                     | 0.0115             | -2.08                  |
| <i>Col14a1</i>                          | NM_181277                                                                        | 0.0205             | -2.07                  |
| <i>Hoxd9</i>                            | NM_013555                                                                        | 0.0314             | -2.07                  |
| <i>Lrrc49</i>                           | NM_001146046 /// NM_001146047 /// NM_145616                                      | 0.0278             | -2.06                  |
| <i>H2afv</i>                            | NM_029938 /// XM_001476068 /// XM_907680                                         | 0.0005             | -2.02                  |
| <i>Cbln2</i>                            | NM_172633                                                                        | 0.0214             | -2.01                  |
| <i>Tex15</i>                            | NM_031374                                                                        | 0.0162             | -2.01                  |
| <i>Sox10</i>                            | NM_011437 /// XM_128139 /// XM_985075                                            | 0.0067             | -1.97                  |
| <i>Foxp2</i>                            | NM_053242 /// NM_212435                                                          | 0.0356             | -1.97                  |
| <i>Hapln1</i>                           | NM_013500                                                                        | 0.0022             | -1.97                  |
| <i>Meg3</i>                             | NR_003633 /// NR_027651 /// NR_027652 /// XR_035480 /// XR_035483 /// XR_035484  | 0.0227             | -1.96                  |
| <i>Acan</i>                             | NM_007424                                                                        | 0.0132             | -1.95                  |
| <i>Sfrp2</i>                            | NM_009144                                                                        | 0.0453             | -1.94                  |
| <i>Pou4f1</i>                           | NM_011143                                                                        | 0.0472             | -1.91                  |
| <i>Vcan</i>                             | NM_001081249 /// NM_001134474 /// NM_001134475 /// NM_019389 /// NM_172955       | 0.0160             | -1.88                  |
| <i>Egfl6</i>                            | NM_019397                                                                        | 0.0202             | -1.87                  |
| <i>Adam23</i>                           | NM_001177600 /// NM_011780                                                       | 0.0148             | -1.87                  |
| <i>Mepe</i>                             | NM_053172                                                                        | 0.0139             | -1.85                  |
| <i>Rian</i>                             | NR_028261 /// XM_901568 /// XM_922645                                            | 0.0274             | -1.84                  |
| <i>Hdgfrp2</i>                          | NM_008233                                                                        | 0.0396             | -1.84                  |
| <i>H2afb3 /// Vps52</i>                 | NM_172620 /// XM_619451 /// XM_889501 /// XM_911022                              | 0.0116             | -1.83                  |
| <i>Fbln7</i>                            | NM_024237                                                                        | 0.0172             | -1.81                  |
| <i>Ccl19</i>                            | NM_011888                                                                        | 0.0004             | -1.81                  |
| <i>Cpm</i>                              | NM_027468 /// XM_917914 /// XM_994613                                            | 0.0006             | -1.80                  |
| <i>Loxl1</i>                            | NM_010729                                                                        | 0.0265             | -1.78                  |
| <i>Pcdhb15</i>                          | NM_053140                                                                        | 0.0386             | -1.78                  |
| <i>Lce1a2</i>                           | NM_028625                                                                        | 0.0097             | -1.78                  |
| <i>Edar</i>                             | NM_010100                                                                        | 0.0460             | -1.78                  |
| <i>Kcp</i>                              | NM_001029985                                                                     | 0.0101             | -1.77                  |
| <i>Klf14</i>                            | NM_001135093 /// XM_001476241 /// XM_884028                                      | 0.0184             | -1.77                  |
| <i>Gal3st4</i>                          | NM_001033416                                                                     | 0.0486             | -1.74                  |
| <i>Ahnak2</i>                           | NM_001033476 /// XM_001475946                                                    | 0.0180             | -1.73                  |
| <i>Hs3st3a1</i>                         | NM_178870                                                                        | 0.0156             | -1.73                  |
| <i>Erbp3</i>                            | NM_010153                                                                        | 0.0004             | -1.73                  |
| <i>Mup1 /// Mup10 /// Mup2 /// Mup3</i> | NM_001039544 /// NM_001045550 /// NM_001122647 /// NM_001163010 /// NM_001163011 | 0.0000             | -1.72                  |
| <i>Vwf</i>                              | NM_011708                                                                        | 0.0463             | -1.71                  |
| <i>Rbm16</i>                            | NM_134123 /// XM_619423 /// XM_918778                                            | 0.0019             | -1.68                  |
| <i>Utp18</i>                            | NM_001013375                                                                     | 0.0024             | -1.67                  |
| <i>Pcdhb22</i>                          | NM_053147                                                                        | 0.0223             | -1.66                  |
| <i>Fam160b2</i>                         | NM_194345 /// XM_001480783 /// XM_914171                                         | 0.0040             | -1.65                  |
| <i>Finc</i>                             | NM_001081185                                                                     | 0.0115             | -1.65                  |
| <i>Fetub</i>                            | NM_001083904 /// NM_001083905 /// NM_021564                                      | 0.0027             | -1.64                  |
| <i>Inha</i>                             | NM_010564                                                                        | 0.0453             | -1.63                  |
| <i>Hoxd8</i>                            | NM_008276                                                                        | 0.0459             | -1.63                  |
| <i>Cd83</i>                             | NM_009856                                                                        | 0.0065             | -1.63                  |
| <i>Six6os1</i>                          | NM_029444                                                                        | 0.0379             | -1.63                  |
| <i>Slc7a2</i>                           | NM_001044740 /// NM_007514                                                       | 0.0289             | -1.63                  |
| <i>Vgll3</i>                            | NM_028572 /// XM_001480406 /// XM_283372                                         | 0.0376             | -1.62                  |
| <i>Magi2</i>                            | NM_001170745 /// NM_001170746 /// NM_015823 /// XM_001000876 /// XM_001000915 // | 0.0170             | -1.62                  |
| <i>Rspo3</i>                            | NM_028351                                                                        | 0.0283             | -1.62                  |
| <i>Rspo2</i>                            | NM_172815                                                                        | 0.0104             | -1.61                  |
| <i>Megf6</i>                            | NM_001162977 /// XM_620148 /// XM_909777                                         | 0.0290             | -1.60                  |
| <i>Dnm1</i>                             | NM_010065                                                                        | 0.0270             | -1.60                  |
| <i>Lin7b</i>                            | NM_011698                                                                        | 0.0372             | -1.60                  |
| <i>Aif1</i>                             | NM_145144                                                                        | 0.0066             | -1.60                  |
| <i>Hs3st3b1</i>                         | NM_018805                                                                        | 0.0239             | -1.59                  |
| <i>Rpp30</i>                            | NM_019428                                                                        | 0.0134             | -1.59                  |
| <i>Rad54l</i>                           | NM_001122958 /// NM_001122959 /// NM_009015                                      | 0.0170             | -1.59                  |
| <i>Sdk1</i>                             | NM_177879                                                                        | 0.0478             | -1.59                  |
| <i>Tmem26</i>                           | NM_177794                                                                        | 0.0374             | -1.59                  |
| <i>Zfr2</i>                             | NM_001034895                                                                     | 0.0291             | -1.58                  |
| <i>Pla2g4b</i>                          | NM_145378                                                                        | 0.0259             | -1.57                  |
| <i>Prdm6</i>                            | NM_001033281                                                                     | 0.0166             | -1.57                  |
| <i>Ypel4</i>                            | NM_001005342                                                                     | 0.0317             | -1.57                  |
| <i>Ephb3</i>                            | NM_010143                                                                        | 0.0255             | -1.56                  |
| <i>Igfbp5</i>                           | NM_010518                                                                        | 0.0004             | -1.56                  |
| <i>Cap2</i>                             | NM_026056                                                                        | 0.0226             | -1.56                  |
| <i>Bmp4</i>                             | NM_007554                                                                        | 0.0189             | -1.55                  |
| <i>Zfp40</i>                            | NM_009555                                                                        | 0.0020             | -1.55                  |
| <i>Shisa2</i>                           | NM_145463                                                                        | 0.0337             | -1.55                  |
| <i>Tmem44</i>                           | NM_172614                                                                        | 0.0138             | -1.55                  |
| <i>Arhgef10</i>                         | NM_001037736 /// NM_172751                                                       | 0.0453             | -1.55                  |
| <i>Smpd3b</i>                           | NM_133888                                                                        | 0.0423             | -1.55                  |
| <i>Gng8</i>                             | NM_010320                                                                        | 0.0126             | -1.55                  |
| <i>Dnahc8</i>                           | NM_013811                                                                        | 0.0160             | -1.55                  |

|                             |                                                                            |        |       |
|-----------------------------|----------------------------------------------------------------------------|--------|-------|
| Fam131b                     | NM_001113327 /// NM_029528                                                 | 0.0489 | -1.54 |
| Capn6                       | NM_007603                                                                  | 0.0109 | -1.54 |
| Ltbp2                       | NM_013589                                                                  | 0.0200 | -1.54 |
| Atp8b1                      | NM_001001488                                                               | 0.0223 | -1.54 |
| Sic6a7                      | NM_201353                                                                  | 0.0314 | -1.54 |
| Arl4d                       | NM_025404 /// XM_001471772                                                 | 0.0035 | -1.54 |
| Col16a1                     | NM_028266                                                                  | 0.0443 | -1.53 |
| Dscc1                       | NM_183089                                                                  | 0.0006 | -1.53 |
| Cpxm2                       | NM_018867                                                                  | 0.0237 | -1.53 |
| Sic9a5                      | NM_001081332                                                               | 0.0063 | -1.52 |
| Cdon                        | NM_021339                                                                  | 0.0073 | -1.52 |
| Rbpj                        | NM_001080927 /// NM_001080928 /// NM_009035                                | 0.0429 | -1.52 |
| Leng8                       | NM_172736                                                                  | 0.0213 | -1.52 |
| Cpne5                       | NM_153166                                                                  | 0.0334 | -1.51 |
| Hic1                        | NM_001098203 /// NM_010430                                                 | 0.0417 | -1.50 |
| Rnf144b                     | NM_001170643 /// NM_146042                                                 | 0.0188 | 1.50  |
| Rassf3                      | NM_138956                                                                  | 0.0347 | 1.50  |
| Rab44                       | NM_001002786                                                               | 0.0048 | 1.50  |
| Picd1                       | NM_019676                                                                  | 0.0347 | 1.50  |
| Eps8 /// LOC632638          | NM_007945 /// XR_031552                                                    | 0.0126 | 1.50  |
| Etl4                        | NM_001081006 /// NM_001177630 /// NM_001177631 /// NM_029895 /// NM_178059 | 0.0029 | 1.51  |
| Podxl                       | NM_013723                                                                  | 0.0043 | 1.51  |
| Myct1                       | NM_026793                                                                  | 0.0418 | 1.51  |
| Nr4a1                       | NM_010444                                                                  | 0.0368 | 1.51  |
| Lifr                        | NM_001113386 /// NM_013584                                                 | 0.0345 | 1.51  |
| Ddo                         | NM_027442                                                                  | 0.0191 | 1.51  |
| Wdr26                       | NM_145514                                                                  | 0.0284 | 1.52  |
| Acyp2                       | NM_029344                                                                  | 0.0048 | 1.52  |
| Pth1r                       | NM_001083935 /// NM_001083936 /// NM_011199                                | 0.0369 | 1.52  |
| Kcnk1                       | NM_008430                                                                  | 0.0073 | 1.52  |
| Tpp2                        | NM_009418                                                                  | 0.0001 | 1.52  |
| Hspb7                       | NM_013868                                                                  | 0.0155 | 1.53  |
| Lama4                       | NM_010681                                                                  | 0.0300 | 1.53  |
| Trps1                       | NM_032000                                                                  | 0.0234 | 1.53  |
| Wisp1                       | NM_018865                                                                  | 0.0422 | 1.53  |
| Alpl                        | NM_007431                                                                  | 0.0109 | 1.53  |
| Rom1                        | NM_009073                                                                  | 0.0266 | 1.53  |
| Lama1                       | NM_008480                                                                  | 0.0178 | 1.53  |
| Strn                        | NM_011500                                                                  | 0.0190 | 1.53  |
| Arl5b                       | NM_029466                                                                  | 0.0096 | 1.53  |
| Asb10                       | NM_080444                                                                  | 0.0239 | 1.54  |
| Kcnma1                      | NM_010610                                                                  | 0.0066 | 1.54  |
| Id3                         | NM_008321                                                                  | 0.0200 | 1.54  |
| Galnt3                      | NM_015736 /// XM_885274 /// XM_980400                                      | 0.0105 | 1.55  |
| Ms4d4c                      | NM_029499                                                                  | 0.0302 | 1.55  |
| Pde6c                       | NM_001170959 /// NM_033614                                                 | 0.0303 | 1.55  |
| Gimap6                      | NM_153175                                                                  | 0.0019 | 1.55  |
| Mefv                        | NM_001161790 /// NM_001161791 /// NM_019453                                | 0.0283 | 1.55  |
| Rab37                       | NM_001163753 /// NM_021411                                                 | 0.0110 | 1.55  |
| Card6                       | NM_001163138 /// XM_139295 /// XM_904712                                   | 0.0063 | 1.56  |
| Sfmbt2                      | NM_177386                                                                  | 0.0304 | 1.56  |
| Tmod3                       | NM_016963                                                                  | 0.0303 | 1.56  |
| Rabgap1                     | NM_001033960 /// NM_146121                                                 | 0.0185 | 1.56  |
| Rhag                        | NM_011269                                                                  | 0.0482 | 1.57  |
| Ets1                        | NM_001038642 /// NM_011808                                                 | 0.0307 | 1.57  |
| Fit4                        | NM_008029                                                                  | 0.0436 | 1.57  |
| Abcd2                       | NM_011994                                                                  | 0.0024 | 1.57  |
| Pltp                        | NM_011125                                                                  | 0.0320 | 1.57  |
| Kdm6a                       | NM_009483                                                                  | 0.0109 | 1.57  |
| Cd200                       | NM_010818                                                                  | 0.0111 | 1.57  |
| Chd4                        | NM_145979                                                                  | 0.0344 | 1.57  |
| Ddit4                       | NM_029083                                                                  | 0.0118 | 1.58  |
| Kel                         | NM_032540                                                                  | 0.0335 | 1.58  |
| Cdh15                       | NM_007662                                                                  | 0.0151 | 1.58  |
| Kcnma1                      | NM_010610                                                                  | 0.0412 | 1.58  |
| Cdc42ep3                    | NM_026514                                                                  | 0.0030 | 1.58  |
| Scn3a                       | NM_018732                                                                  | 0.0365 | 1.59  |
| Cdh2                        | NM_007664                                                                  | 0.0188 | 1.59  |
| Apod                        | NM_007470                                                                  | 0.0214 | 1.59  |
| Ccnd1                       | NM_007631                                                                  | 0.0104 | 1.59  |
| Cams1                       | NM_134148 /// XM_902445 /// XM_919865                                      | 0.0040 | 1.60  |
| Actb                        | NM_007393                                                                  | 0.0134 | 1.61  |
| Pdgfa                       | NM_008808                                                                  | 0.0156 | 1.61  |
| Pde1a                       | NM_001009978 /// NM_001009979 /// NM_001159582 /// NM_016744               | 0.0453 | 1.61  |
| Zfa /// Zfx                 | NM_001044386 /// NM_009540 /// NM_011768                                   | 0.0328 | 1.62  |
| St3gal6                     | NM_018784                                                                  | 0.0253 | 1.62  |
| Hist1h2be                   | NM_001177653 /// NM_178194                                                 | 0.0218 | 1.62  |
| Cd93                        | NM_010740                                                                  | 0.0011 | 1.63  |
| Asb4                        | NM_023048                                                                  | 0.0397 | 1.63  |
| H2-T10 /// H2-T22 /// H2-T9 | NM_010395 /// NM_010397 /// NM_010399                                      | 0.0337 | 1.64  |
| Kcnk1                       | NM_008430                                                                  | 0.0107 | 1.64  |
| Rbp7                        | NM_022020                                                                  | 0.0277 | 1.64  |
| Tmie                        | NM_146260                                                                  | 0.0136 | 1.64  |
| Hhip                        | NM_020259                                                                  | 0.0003 | 1.65  |
| Chst15                      | NM_029935                                                                  | 0.0208 | 1.65  |
| Cuedc1                      | NM_001172099 /// NM_198013                                                 | 0.0128 | 1.65  |
| Zfp3611                     | NM_007564                                                                  | 0.0136 | 1.65  |
| Gsg2                        | NM_010353                                                                  | 0.0105 | 1.65  |
| Wnt4                        | NM_009523                                                                  | 0.0448 | 1.66  |
| Notch4                      | NM_010929                                                                  | 0.0132 | 1.67  |
| Taf4b                       | NM_001100449 /// XM_128905 /// XM_911701                                   | 0.0432 | 1.68  |
| Dnahc6                      | NM_001164669 /// XM_001478021 /// XM_913416                                | 0.0257 | 1.69  |
| Egr2                        | NM_010118                                                                  | 0.0129 | 1.69  |
| Enpp6                       | NM_177304                                                                  | 0.0309 | 1.69  |
| Abcg3                       | NM_030239                                                                  | 0.0416 | 1.70  |
| Fbxo32                      | NM_026346                                                                  | 0.0051 | 1.70  |

|                   |                                                        |          |       |
|-------------------|--------------------------------------------------------|----------|-------|
| Rasgrp2           | NM_011242                                              | 0.0007   | 1.71  |
| Ano1              | NM_178642                                              | 0.0129   | 1.71  |
| Vil1              | NM_009509                                              | 0.0356   | 1.71  |
| Ncf1              | NM_010876                                              | 0.0097   | 1.74  |
| Xaf1              | NM_001037713                                           | 0.0358   | 1.74  |
| Mef2c             | NM_001170537 /// NM_025282                             | 0.0133   | 1.75  |
| Ddr1              | NM_007584 /// NM_172962                                | 0.0317   | 1.76  |
| Col22a1           | NM_027174 /// XM_907370 /// XM_981889                  | 0.0077   | 1.77  |
| Uba6              | NM_172712                                              | 0.0145   | 1.77  |
| Ranbp3l           | NM_198024 /// XM_001473207                             | 0.0233   | 1.78  |
| Spic              | NM_011461                                              | 0.0469   | 1.78  |
| Ramp1             | NM_001168392 /// NM_016894 /// NM_178401               | 0.0076   | 1.78  |
| Gcet2             | NM_001159297 /// NM_008099                             | 0.0045   | 1.79  |
| Myom1             | NM_001083934 /// NM_010867                             | 0.0161   | 1.81  |
| Dysf              | NM_001077694 /// NM_021469                             | 0.0395   | 1.81  |
| Hrc               | NM_010473                                              | 0.0248   | 1.83  |
| Lifr              | NM_001113386 /// NM_013584                             | 0.0313   | 1.83  |
| Wnk4              | NM_175638                                              | 0.0274   | 1.83  |
| Ihh               | NM_010544                                              | 0.0071   | 1.83  |
| Sic13a5           | NM_001004148                                           | 0.0026   | 1.84  |
| Chst13            | NM_027928 /// XM_978459 /// XM_994764                  | 0.0449   | 1.84  |
| Sgca              | NM_001136080 /// NM_009161                             | 0.0125   | 1.84  |
| Fit1              | NM_010228                                              | 0.0265   | 1.85  |
| Btl19             | NM_172793                                              | 0.0091   | 1.87  |
| Ibsp              | NM_008318                                              | 0.0041   | 1.87  |
| Clic5             | NM_172621                                              | 0.0145   | 1.89  |
| Sos1              | NM_009231                                              | 0.0221   | 1.90  |
| Agt               | NM_007428                                              | 0.0017   | 1.91  |
| Wdr63             | NM_172864                                              | 0.0124   | 1.93  |
| Rnf43             | NM_172448                                              | 0.0340   | 1.93  |
| Bmp8b             | NM_007559                                              | 0.0449   | 1.95  |
| Myl3              | NM_010859                                              | 0.0173   | 1.97  |
| Bmp8a             | NM_007558                                              | 0.0064   | 1.98  |
| Capsl             | NM_029341                                              | 0.0165   | 1.98  |
| Cadm1             | NM_001025600 /// NM_018770 /// NM_207675 /// NM_207676 | 0.0107   | 2.01  |
| Notum             | NM_175263                                              | 0.0122   | 2.01  |
| Ahsp              | NM_133245                                              | 0.0023   | 2.05  |
| Sic4a1            | NM_011403                                              | 0.0076   | 2.07  |
| Panx3             | NM_172454                                              | 0.0191   | 2.09  |
| Hba-a1 /// Hba-a2 | NM_001083955 /// NM_008218                             | 0.0014   | 2.10  |
| Fil1              | NM_008026                                              | 0.0207   | 2.10  |
| Mlph              | NM_053015                                              | 0.0229   | 2.14  |
| Fosb              | NM_008036                                              | 0.0494   | 2.14  |
| Adamts18          | NM_172466                                              | 0.0094   | 2.19  |
| H2-Q10            | NM_010391                                              | 0.0026   | 2.23  |
| Gypa              | NM_010369                                              | 0.0465   | 2.47  |
| Nr4a3             | NM_015743                                              | 0.0333   | 2.47  |
| Ankrd56           | NM_175270                                              | 0.0032   | 2.56  |
| Chi3l3 /// Chi3l4 | NM_009892 /// NM_145126                                | 0.0302   | 2.58  |
| Klhl30            | NM_027551                                              | 0.0241   | 2.64  |
| Chi3l3            | NM_009892                                              | 0.0373   | 2.67  |
| Chad              | NM_007689                                              | 4.73E-05 | 2.79  |
| Elovl7            | NM_029001                                              | 0.0137   | 2.89  |
| H2afb3            | XM_619451 /// XM_889501 /// XM_911022                  | 2.34E-05 | 2.90  |
| Spink3            | NM_009258                                              | 0.0414   | 2.91  |
| Sic22a6           | NM_008766                                              | 0.0467   | 2.92  |
| Sic30a2           | NM_001039677                                           | 0.0018   | 3.11  |
| Tns3              | NM_001083587                                           | 0.0024   | 3.49  |
| Btla              | NM_001037719 /// NM_177584                             | 0.0011   | 3.56  |
| Car12             | NM_178396                                              | 0.0255   | 4.88  |
| Rpl7l1            | NM_025433                                              | 0.0029   | 9.42  |
| Xist              | NR_001463 /// NR_001570                                | 0.0414   | 20.72 |
